# Supplementary material for: NRAS Q61R , BRAF V600E immunohistochemistry: a concomitant tool for mutation screening in melanomas
Source: Springer Nature journal article supplement (doi:10.1186/s13000-015-0359-0), 2015-07-24
Supplement: MOESM1 [file 9771954]

Supplementary data: Detailed features of cases and samples analyzed.

| <b>Case</b> | <b>Age at time of primary tumor diagnosis /Gender</b> | <b>Primitive lesion type, site and thickness (mm)/ metastatic site</b> | <b>Percentage of tumor cells in samples</b> | <b>Melanin pigmentation</b> | <b>BRAFV600 genotype (pyrosequencing)</b> | <b>IHC BRAFV600E (VE1) proportion of cells/intensity</b> | <b>NRASQ61 genotype (pyrosequencing)</b> | <b>IHC NRASQ61R (SP174) proportion of cells/intensity</b> |   |
|-------------|-------------------------------------------------------|------------------------------------------------------------------------|---------------------------------------------|-----------------------------|-------------------------------------------|----------------------------------------------------------|------------------------------------------|-----------------------------------------------------------|---|
| <b>1</b>    | 59/male                                               | NM, face, 3,25                                                         | 80                                          | 3+                          | NC                                        | 0                                                        | WT                                       | 0                                                         |   |
|             |                                                       | Lymph node                                                             | 60                                          | 3+                          | WT                                        | 0                                                        | WT                                       | 0                                                         |   |
| <b>2</b>    | 41/male                                               | Lymph node                                                             | 80                                          | 0                           | V600E                                     | 4+, strong                                               | WT                                       | 0                                                         |   |
| <b>3</b>    | 51/male                                               | SSM, back, 2,2                                                         | 80                                          | 1+                          | NC                                        | 0                                                        | NC                                       | 0                                                         |   |
|             |                                                       | Lymph node                                                             | 95                                          | 0                           | WT                                        | 0                                                        | WT                                       | 0                                                         |   |
|             |                                                       | Skin                                                                   | 90                                          | 1+                          | WT                                        | 0                                                        | WT                                       | 0                                                         |   |
| <b>4</b>    | 75/male                                               | SSM, back,2,9                                                          | 70                                          | 1+                          | V600E                                     | 4+, strong                                               | WT                                       | 0                                                         |   |
|             |                                                       | Lymph node                                                             | 20                                          | 0                           | NC                                        | 4+, strong                                               | WT                                       | 0                                                         |   |
|             |                                                       | Lymph node                                                             | 40                                          | 0                           | 0                                         | V600E                                                    | 4+, strong                               | WT                                                        | 0 |
|             |                                                       | Lymph node                                                             | 10                                          | 0                           | 0                                         | WT                                                       | 3+, weak                                 | WT                                                        | 0 |
| <b>5</b>    | 90/female                                             | SSM, heel, 9                                                           | 95                                          | 1+                          | NC                                        | 0                                                        | NC                                       | 0                                                         |   |

|           |           |                |    |    |       |            |      |            |
|-----------|-----------|----------------|----|----|-------|------------|------|------------|
|           |           | Skin           | 90 | 0  | NC    | 0          | NC   | 0          |
| <b>6</b>  | 72/male   | Lymph node     | 90 | 0  | WT    | 0          | Q61R | 1+, strong |
| <b>7</b>  | 68/male   | SSM, ear, 1,95 | 70 | 0  | WT    | 0          | WT   | 0          |
|           |           | Lung           | 90 | 0  | NC    | 0          | NC   | 0          |
| <b>8</b>  | 88/female | SSM, calf, 13  | 90 | 1+ | V600E | 4+, strong | WT   | 0          |
|           |           | Lymph node     | 80 | 2+ | V600E | 4+, strong | WT   | 0          |
| <b>9</b>  | 75/female | NM, calf, 2,5  | 80 | 0  | NC    | 0          | NC   | 0          |
|           |           | In-transit     | 5  | 0  | NC    | 0          | NC   | 0          |
|           |           | In-transit     | 90 | 0  | WT    | 0          | Q61L | 0          |
| <b>10</b> | 81/female | MLM, nasal     | 70 | 0  | WT    | 0          | Q61K | 0          |
|           |           | In transit     | 90 | 0  | WT    | 0          | Q61K | 0          |
| <b>11</b> | 72/female | MLM, nasal     | 90 | 0  | NC    | 0          | NC   | 0          |
|           |           | Stomach        | 90 | 0  | NC    | 0          | WT   | 0          |
| <b>12</b> | 77/male   | SSM, back, 1,2 | 20 | 3+ | WT    | 0          | WT   | 0          |
|           |           | Lymph node     | 80 | 4+ | WT    | 0          | WT   | 0          |
|           |           | Mesentery      | 70 | 1+ | WT    | 0          | WT   | 0          |
| <b>13</b> | 59/male   | Parotid gland  | 50 | 1+ | WT    | 0          | WT   | 0          |
| <b>14</b> | 54/male   | Liver          | 25 | 2+ | WT    | 0          | WT   | 0          |
| <b>15</b> | 43/male   | NM, knee, 1,8  | 90 | 0  | NC    | 0          | Q61R | 3+, strong |

|           |           |                  |    |    |       |            |      |            |
|-----------|-----------|------------------|----|----|-------|------------|------|------------|
|           |           | Local recurrency | 70 | 0  | WT    | 0          | Q61R | 4+, strong |
|           |           | Lymph node       | 95 | 0  | NC    | 0          | NC   | 4+, strong |
|           |           | Lymph node       | 90 | 0  | WT    | 0          | Q61R | 4+, strong |
| <b>16</b> | 86/male   | Lymph node       | 90 | 0  | V600E | 4+, strong | WT   | 0          |
| <b>17</b> | 67/female | Lymph node       | 90 | 0  | WT    | 0          | Q61R | 4+, strong |
| <b>18</b> | 70/male   | SSM, arm,1,2     | 50 | 0  | WT    | 4+, strong | WT   | 0          |
| <b>19</b> | 79/male   | SSM, flank, 5,6  | 80 | 1+ | WT    | 0          | Q61R | 4+, strong |
|           |           | Lymph node       | 90 | 0  | WT    | 0          | Q61R | 4+, weak   |
| <b>20</b> | 71/female | Skin             | 60 | 0  | WT    | 0          | WT   | 0          |
| <b>21</b> | 42/male   | SSM, leg, 10     | 90 | 0  | WT    | 0          | Q61R | 2+, weak   |
| <b>22</b> | 87/male   | NM, face, 10,5   | 80 | 2+ | WT    | 0          | WT   | 0          |
| <b>23</b> | 74/male   | Lymph node       | 80 | 0  | WT    | 0          | WT   | 0          |
| <b>24</b> | 65/male   | SSM, ear,7       | 95 | 0  | WT    | 0          | WT   | 0          |
|           |           | In-transit       | 80 | 0  | NC    | 0          | WT   | 0          |
| <b>25</b> | 75/female | SSM, trunk, 4    | 30 | 0  | V600R | 0          | WT   | 0          |
|           |           | Lymph node       | 90 | 1+ | V600R | 0          | WT   | 0          |
|           |           | Lymph node       | 90 | 0  | V600R | 0          | WT   | 0          |
|           |           | Lymph node       | 80 | 0  | V600R | 0          | WT   | 0          |
| <b>26</b> | 52/male   | NM, trunk, 7,1   | 70 | 0  | WT    | 0          | WT   | 0          |

|           |           |                  |     |    |       |            |      |            |
|-----------|-----------|------------------|-----|----|-------|------------|------|------------|
| <b>27</b> | 55/female | Brain            | 95  | 0  | WT    | 0          | WT   | 0          |
|           |           | Brain            | 70  | 0  | WT    | 0          | WT   | 0          |
| <b>28</b> | 37/male   | Brain            | 50  | 4+ | V600E | 4+, strong | WT   | 0          |
| <b>29</b> | 59/male   | Lymph node       | 50  | 0  | WT    | 0          | Q61R | 4+, weak   |
| <b>30</b> | 50/female | Brain            | 90  | 0  | WT    | 0          | Q61K | 0          |
|           |           | Lung             | 90  | 0  | WT    | 0          | Q61K | 0          |
| <b>31</b> | 68/female | NM, face, 2,4    | 80  | 1+ | WT    | 0          | WT   | 0          |
| <b>32</b> | 17/female | SSM, scalp, 2,5  | 30  | 0  | WT    | 0          | WT   | 0          |
|           |           | Lymph node       | 80  | 1+ | WT    | 0          | WT   | 0          |
| <b>33</b> | 61/male   | SSM,foot, 6      | 70  | 1+ | WT    | 0          | WT   | 0          |
|           |           | Lymph node       | 95  | 2+ | WT    | 0          | WT   | 0          |
| <b>34</b> | 39/female | NM, back, 3,9    | 50  | 0  | V600E | 4+, weak   | WT   | 0          |
| <b>35</b> | 40/female | Liver            | 100 | 1+ | WT    | 0          | WT   | 0          |
| <b>36</b> | 52/male   | Lymph node       | 90  | 0  | WT    | 0          | Q61K | 0          |
| <b>37</b> | 67/male   | NM, back,12      | 75  | 1+ | NC    | 0          | WT   | 0          |
|           |           | Local recurrence | 80  | 0  | WT    | 0          | WT   | 0          |
|           |           | Lymph node       | 80  | 2+ | WT    | 0          | WT   | 0          |
| <b>38</b> | 44/female | Skin             | 90  | 0  | WT    | 0          | WT   | 0          |
| <b>39</b> | 73/female | SSM, leg, 2,5    | 20  | 1+ | NC    | 0          | Q61R | 3+, strong |

|           |           |                 |     |    |       |            |      |            |
|-----------|-----------|-----------------|-----|----|-------|------------|------|------------|
|           |           | Mesentery       | 50* | 4+ | WT    | 0          | WT   | 0          |
| <b>40</b> | 64/male   | SSM, heel, 2,5  | 15  | 3+ | WT    | 0          | WT   | 0          |
|           |           | Lymph node      | 20  | 4+ | WT    | 0          | WT   | 0          |
| <b>41</b> | 82/male   | Lymph node      | 95  | 2+ | V600E | 4+, weak   | WT   | 0          |
|           |           | Lymph node      | 35  | 0  | V600E | 4+, strong | WT   | 0          |
| <b>42</b> | 61/male   | Lung            | 70  | 1+ | WT    | 0          | Q61R | 3+, strong |
|           |           | Brain           | 40  | 0  | WT    | 0          | Q61R | 2+, strong |
| <b>43</b> | 49/female | NM, face, 5,5   | 90  | 0  | V600E | 3+, strong | WT   | 0          |
| <b>44</b> | 68/female | NM, face, 2,5   | 80  | 1+ | V600E | 4+, weak   | WT   | 0          |
| <b>45</b> | 63/male   | NM, face, 11    | 90  | 0  | WT    | 0          | WT   | 0          |
| <b>46</b> | 71/male   | Skin            | 90  | 0  | WT    | 0          | Q61R | 4+, weak   |
| <b>47</b> | 61/male   | NM, back, 11    | 90  | 1+ | WT    | 0          | WT   | 0          |
|           |           | Skin            | 30  | 1+ | WT    | 0          | WT   | 0          |
|           |           | Brain           | 90  | 4+ | WT    | 0          | WT   | 0          |
| <b>48</b> | 56/male   | DM, temple, 3,5 | 10  | 0  | WT    | 0          | WT   | 0          |
|           |           | Lymph node      | 95  | 0  | WT    | 1+, weak   | WT   | 0          |
|           |           | Lymph node      | 40  | 0  | WT    | 0          | WT   | 0          |
|           |           | Skin            | 80  | 0  | NC    | 0          | WT   | 0          |
| <b>49</b> | 64/male   | Liver           | 60  | 3+ | WT    | 0          | WT   | 0          |

|           |           |                  |    |    |       |            |      |            |
|-----------|-----------|------------------|----|----|-------|------------|------|------------|
| <b>50</b> | 51/female | Skin             | 60 | 0  | WT    | 0          | WT   | 0          |
| <b>51</b> | 63/female | NM, face, 3      | 60 | 0  | V600E | 4+, strong | WT   | 0          |
|           |           | Parotid gland    | 20 | 1+ | V600E | 1+, weak   | WT   | 0          |
| <b>52</b> | 86/female | Local recurrence | 60 | 0  | WT    | 0          | Q61L | 0          |
| <b>53</b> | 75/male   | SSM, back, 2,7   | 40 | 0  | V600K | 0          | WT   | 0          |
|           |           | Lymph node       | 70 | 0  | V600K | 0          | WT   | 0          |
| <b>54</b> | 55/male   | Primitive biopsy | 50 | 0  | V600K | 0          | WT   | 0          |
|           |           | Lymph node       | 80 | 1+ | V600K | 0          | WT   | 0          |
| <b>55</b> | 55/male   | Skin             | 80 | 0  | V600E | 4+, strong | WT   | 0          |
| <b>56</b> | 89/female | Primitive biopsy | 80 | 0  | V600R | 0          | WT   | 0          |
| <b>57</b> | 80/male   | Primitive biopsy | 80 | 0  | WT    | 0          | Q61L | 0          |
| <b>58</b> | 53/male   | Primitive biopsy | 90 | 0  | V600R | 0          | WT   | 0          |
| <b>59</b> | 49/male   | NM, back, 9      | 90 | 2+ | WT    | 0          | Q61R | 4+, strong |
| <b>60</b> | 68/female | NM, leg, 27      | 90 | 0  | WT    | 0          | Q61L | 0          |
|           |           | In-transit       | 90 | 1+ | WT    | 0          | Q61L | 0          |
|           |           | Skin             | 80 | 0  | WT    | 0          | Q61L | 0          |
|           |           | Skin             | 70 | 0  | WT    | 0          | Q61L | 0          |
| <b>61</b> | 31/male   | SSM, arm, 5      | 90 | 2+ | WT    | 4+, weak** | Q61K | 0**        |
|           |           | Local recurrence | 10 | 3+ | WT    | 4+, weak** | WT   | 0**        |

|           |           |               |    |    |       |            |      |            |
|-----------|-----------|---------------|----|----|-------|------------|------|------------|
|           |           | Lymph node    | 90 | 3+ | WT    | 0          | Q61K | 0          |
| <b>62</b> | 81/female | Lymph node    | 60 | 0  | WT    | 0          | Q61R | 4+, strong |
| <b>63</b> | 40/male   | Lymph node    | 90 | 0  | V600E | 4+, weak   | WT   | 0          |
| <b>64</b> | 24/male   | SSM, leg, 1,3 | 20 | 0  | NC    | 3+, weak   | NC   | 0          |
|           |           | Lymph node    | 70 | 1+ | V600E | 3+, strong | WT   | 0          |
| <b>65</b> | 64/male   | Lymph node    | 70 | 0  | V600K | 0          | WT   | 0          |
|           |           | Lymph node    | 90 | 0  | V600K | 0          | WT   | 0          |
| <b>66</b> | 81/female | SSM, foot, 2  | 2  | 0  | NC    | 0          | WT   | 2+, weak   |
|           |           | In-transit    | 70 | 1+ | NC    | 0          | NC   | 0          |
|           |           | Lymph node    | 90 | 2+ | WT    | 0          | Q61R | 3+, strong |
|           |           | Skin          | 80 | 0  | WT    | 0          | Q61R | 4+, strong |
| <b>67</b> | 70/female | SSM arm 2,2   | 50 | 1+ | WT    | 0          | Q61R | 2+, strong |
|           | 74/female | In-transit    | 70 | 0  | WT    | 0          | Q61R | 3+, weak   |
|           | 75/female | Skin          | 80 | 0  | WT    | 0          | Q61R | 4+, strong |
|           |           | Skin          | 20 | 0  | WT    | 0          | Q61R | 4+, strong |
|           |           | Skin          | 80 | 0  | WT    | 0          | Q61R | 4+, strong |
| <b>68</b> | 60/female | Lymph node    | 60 | 0  | V600E | 4+, strong | WT   | 0          |
| <b>69</b> | 50/female | NM, nail, 10  | 90 | 1+ | NC    | 0          | NC   | 0          |
|           |           | Skin          | 95 | 0  | WT    | 0          | NC   | 0          |

|           |           |                 |     |    |       |            |      |          |
|-----------|-----------|-----------------|-----|----|-------|------------|------|----------|
|           |           | In-transit      | 90  | 0  | WT    | 0          | WT   | 0        |
|           |           | Lymph node      | 90  | 0  | WT    | 0          | WT   | 0        |
| <b>70</b> | 56/male   | NM, neck, 2,6   | 70  | 1+ | NC    | 2+, strong | WT   | 0        |
|           |           | Lymph node      | 90  | 3+ | NC    | 0          | NC   | 0        |
|           |           | Brain           | 90  | 2+ | V600E | 1+, weak   | WT   | 0        |
| <b>71</b> | 35/female | Lymph node      | 100 | 0  | WT    | 0          | Q61K | 0        |
| <b>72</b> | 61/male   | SSM, back, 12,4 | 80  | 1+ | V600E | 4+, strong | WT   | 0        |
|           |           | Lymph node      | 80  | 3+ | V600E | 3+, weak   | WT   | 0        |
| <b>73</b> | 88/female | Lymph node      | 90  | 0  | WT    | 0          | WT   | 0        |
| <b>74</b> | 76: male  | MLM, anus       | 60  | 1+ | WT    | 0          | WT   | 0        |
|           |           | Lymph node      | 80  | 0  | WT    | 0          | WT   | 0        |
|           |           | Lymph node      | 95  | 0  | WT    | 0          | WT   | 0        |
| <b>75</b> | 77/male   | Skin            | 70  | 0  | V600K | 0          | WT   | 0        |
| <b>76</b> | 63/male   | Lymph node      | 90  | 0  | V600E | 4+, strong | WT   | 0        |
| <b>77</b> | 83/male   | Skin            | 80  | 1+ | WT    | 0          | Q61R | 1+, weak |
| <b>78</b> | 64/male   | Lung            | 70  | 1+ | V600E | 3+, strong | WT   | 0        |
| <b>79</b> | 60/female | NM, trunk,3     | 80  | 0  | V600K | 0          | WT   | 0        |

\* This metastatic sample has been read back because of discrepancies between the two samples of a single patient. In fact, this metastatic sample only consisted in strong pigmented macrophages without obvious viable tumor cells.



\*\* These samples have been read back because of discrepancies between weak positive IHC with BRAF<sup>V600E</sup> antibody and NRAS<sup>Q61K</sup> mutation status.

Finally, a very weak staining with NRAS<sup>Q61R</sup> antibody was also noted, considered initially as non significant. The weak to very weak intensity of both of BRAF<sup>V600E</sup> and NRAS<sup>Q61R</sup> IHC as finally been considered as non specific.

DM: Desmoplastic Melanoma; MLM: Mucosal Lentiginous Melanoma; NM: Nodular Melanoma; SSM: Superficial Spreading Melanoma; WT : wild-type; NC: Non Conclusive.

Scoring system: 0: no staining ; 1+: staining of less than 25% of tumor cells; 2+: staining of 26% to 50% of tumor cells; 3+: staining of 51% to 75% of tumor cells; 4+: staining of more than 75% of tumor cells.
